# Supplementary material for: Positive Intervention of Distinct Peptides in Clostridioides difficile Infection in a Mouse Model
Source: PubMed Central journal article supplement — Commun Biol. 2024 Sep 18;7:1172. doi: 10.1038/s42003-024-06850-x (PMC11410834; doi:10.1038/s42003-024-06850-x), 2024-09-18
Supplement: 42003_2024_6850_MOESM2_ESM.pdf [file 42003_2024_6850_MOESM2_ESM.pdf]

Supplementary Table 1 Sequence and mass spectrum analysis results of peptides from

*Engraulis japonicus*

| peptide composition | Molecular weight | Ionic strength       | Percent content (%) |
|---------------------|------------------|----------------------|---------------------|
| MLVGL               | 401.27           | 4.50×10 <sup>8</sup> | 17.99%              |
| MAEAL               | 403.22           | 3.13×10 <sup>8</sup> | 12.50%              |
| MISAL               | 403.25           | 5.86×10 <sup>8</sup> | 23.41%              |
| MSDAL               | 405.20           | 2.75×10 <sup>8</sup> | 10.99%              |
| AGGPI               | 414.23           | 7.45×10 <sup>8</sup> | 29.79%              |
| IGGGI               | 416.25           | 2.71×10 <sup>8</sup> | 10.84%              |
| MGDAI               | 417.20           | 1.73×10 <sup>8</sup> | 6.93%               |
| MLDGI               | 417.23           | 7.15×10 <sup>8</sup> | 28.55%              |
| MSEAI               | 419.21           | 4.15×10 <sup>8</sup> | 16.60%              |
| MLALI               | 429.31           | 1.18×10 <sup>8</sup> | 4.73%               |
| VGASP               | 430.23           | 7.86×10 <sup>7</sup> | 3.14%               |
| MVALQ               | 430.26           | 4.81×10 <sup>8</sup> | 19.23%              |
| MLGLK               | 430.30           | 1.17×10 <sup>8</sup> | 4.69%               |
| GGDAL               | 432.21           | 1.35×10 <sup>8</sup> | 5.39%               |
| MTALQ               | 432.24           | 1.62×10 <sup>8</sup> | 6.48%               |
| MEDGL               | 433.19           | 2.37×10 <sup>8</sup> | 9.46%               |
| MVDLS               | 433.23           | 2.96×10 <sup>8</sup> | 11.84%              |
| MVALM               | 433.24           | 1.27×10 <sup>8</sup> | 5.09%               |
| MTVTI               | 433.26           | 1.88×10 <sup>8</sup> | 7.50%               |
| MTDAE               | 435.17           | 4.02×10 <sup>7</sup> | 1.60%               |
| MEGSF               | 439.18           | 1.53×10 <sup>8</sup> | 6.10%               |
| MVIVN               | 444.28           | 1.77×10 <sup>8</sup> | 7.09%               |
| MLEAI               | 445.26           | 1.16×10 <sup>9</sup> | 46.34%              |
| MVLTL               | 445.30           | 2.78×10 <sup>8</sup> | 11.11%              |
| EGAGI               | 446.22           | 1.47×10 <sup>8</sup> | 5.87%               |
| VVAAS               | 446.26           | 2.33×10 <sup>8</sup> | 9.31%               |
| MSLGE               | 447.21           | 3.08×10 <sup>8</sup> | 12.31%              |
| MTALT               | 447.24           | 5.80×10 <sup>8</sup> | 23.19%              |
| MATPY               | 451.22           | 2.81×10 <sup>8</sup> | 11.22%              |
| LGVAP               | 456.28           | 3.90×10 <sup>8</sup> | 15.57%              |
| IVLGG               | 458.30           | 1.83×10 <sup>8</sup> | 7.33%               |
| MLVDL               | 459.28           | 4.72×10 <sup>8</sup> | 18.87%              |
| MVGGDL              | 460.24           | 2.3×10 <sup>8</sup>  | 9.53%               |

|         |        |                    |        |
|---------|--------|--------------------|--------|
| MKA EI  | 460.27 | $2.87 \times 10^8$ | 11.46% |
| EGGAA   | 461.20 | $2.39 \times 10^7$ | 0.95%  |
| MDVDL   | 461.22 | $5.05 \times 10^8$ | 20.18% |
| MLSLE   | 461.26 | $4.72 \times 10^8$ | 18.86% |
| MTTLE   | 463.24 | $6.84 \times 10^7$ | 2.73%  |
| LGGGY   | 466.23 | $5.48 \times 10^7$ | 2.19%  |
| MKLPL   | 470.33 | $4.46 \times 10^7$ | 1.78%  |
| IGGPK   | 471.29 | $1.80 \times 10^8$ | 7.21%  |
| LVLGAG  | 472.31 | $1.48 \times 10^8$ | 5.89%  |
| MLIVE   | 473.30 | $2.81 \times 10^8$ | 11.22% |
| MLDLN   | 474.25 | $6.71 \times 10^8$ | 26.82% |
| GIDGI   | 474.25 | $6.68 \times 10^8$ | 26.69% |
| ILTGA   | 474.29 | $2.05 \times 10^8$ | 8.21%  |
| MEVVE   | 475.24 | $1.09 \times 10^9$ | 43.52% |
| MITEL   | 475.27 | $1.74 \times 10^8$ | 6.96%  |
| IDGAT   | 476.23 | $1.29 \times 10^8$ | 5.16%  |
| VGGVF   | 478.26 | $1.08 \times 10^8$ | 4.33%  |
| LSPPA   | 484.27 | $1.89 \times 10^8$ | 7.53%  |
| LALPA   | 484.31 | $8.81 \times 10^7$ | 3.52%  |
| VPGVD   | 486.25 | $1.62 \times 10^8$ | 6.46%  |
| MLEIL   | 487.31 | $1.42 \times 10^8$ | 5.67%  |
| ELGGL   | 488.27 | $4.71 \times 10^8$ | 18.84% |
| MLDEL   | 489.25 | $2.71 \times 10^8$ | 10.84% |
| TEAGI   | 490.25 | $2.04 \times 10^8$ | 8.15%  |
| MMDAL   | 491.22 | $4.18 \times 10^7$ | 1.67%  |
| MEITE   | 491.23 | $9.39 \times 10^7$ | 3.75%  |
| MQVDM   | 492.21 | $5.50 \times 10^7$ | 2.20%  |
| VGGPY   | 492.24 | $1.70 \times 10^8$ | 6.80%  |
| TGAIM   | 492.25 | $1.75 \times 10^8$ | 6.98%  |
| EAFGA   | 494.22 | $1.03 \times 10^8$ | 4.12%  |
| MAPAAPA | 497.27 | $7.80 \times 10^7$ | 3.12%  |
| AAALGP  | 499.29 | $7.20 \times 10^7$ | 2.88%  |
| PAAIE   | 500.27 | $1.10 \times 10^8$ | 4.38%  |
| LVVGL   | 500.34 | $1.65 \times 10^7$ | 0.66%  |
| SGPLGA  | 501.27 | $7.31 \times 10^7$ | 2.92%  |
| VAALGA  | 501.30 | $4.40 \times 10^7$ | 1.76%  |
| AVTPD   | 502.25 | $6.61 \times 10^7$ | 2.64%  |
| MELIQ   | 502.29 | $2.52 \times 10^8$ | 10.06% |

|        |        |                      |        |
|--------|--------|----------------------|--------|
| MTIVIG | 502.32 | 2.13×10 <sup>8</sup> | 8.53%  |
| MSIEI  | 503.27 | 2.62×10 <sup>8</sup> | 10.46% |
| EVEGA  | 504.23 | 1.48×10 <sup>8</sup> | 5.91%  |
| MSLGVE | 504.26 | 1.24×10 <sup>8</sup> | 4.95%  |
| MEVEE  | 505.21 | 1.86×10 <sup>8</sup> | 7.41%  |
| PASTM  | 506.23 | 3.71×10 <sup>8</sup> | 14.82% |
| IEDM   | 507.21 | 1.63×10 <sup>8</sup> | 6.53%  |
| LGGDF  | 508.24 | 1.13×10 <sup>8</sup> | 4.53%  |
| ALPHA  | 508.29 | 1.89×10 <sup>8</sup> | 7.54%  |
| AADSF  | 510.22 | 9.04×10 <sup>7</sup> | 3.61%  |
| MSASVF | 510.25 | 7.53×10 <sup>7</sup> | 3.01%  |
| MSEYL  | 511.24 | 1.45×10 <sup>8</sup> | 5.79%  |
| VAGVPA | 513.30 | 7.59×10 <sup>7</sup> | 3.03%  |
| KGVP   | 513.34 | 4.86×10 <sup>7</sup> | 1.94%  |
| MEVPGL | 514.29 | 1.02×10 <sup>8</sup> | 4.07%  |
| VAVVE  | 516.30 | 1.35×10 <sup>8</sup> | 5.40%  |
| IESGL  | 518.28 | 1.49×10 <sup>8</sup> | 5.95%  |
| MEIEE  | 519.23 | 2.98×10 <sup>8</sup> | 11.91% |
| EVDGT  | 520.22 | 5.26×10 <sup>7</sup> | 2.10%  |
| IEEM   | 521.23 | 5.62×10 <sup>7</sup> | 2.24%  |
| DIAGF  | 522.25 | 1.07×10 <sup>8</sup> | 4.26%  |
| VIGAY  | 522.29 | 9.52×10 <sup>7</sup> | 3.81%  |
| LDFFE  | 523.24 | 1.03×10 <sup>8</sup> | 4.11%  |
| IAPEP  | 526.29 | 8.64×10 <sup>7</sup> | 3.45%  |
| LAPPE  | 526.29 | 1.27×10 <sup>7</sup> | 0.51%  |
| LAPEP  | 526.29 | 8.61×10 <sup>7</sup> | 3.44%  |
| LLPAL  | 526.36 | 3.27×10 <sup>7</sup> | 1.31%  |
| LGGLAP | 527.32 | 1.36×10 <sup>8</sup> | 5.43%  |
| VAIPE  | 528.30 | 2.39×10 <sup>8</sup> | 9.55%  |
| MKVAVI | 529.37 | 3.06×10 <sup>7</sup> | 1.22%  |
| NAVGL  | 530.29 | 2.81×10 <sup>7</sup> | 1.12%  |
| VDGAAV | 531.27 | 1.27×10 <sup>8</sup> | 5.06%  |
| LDAGR  | 531.29 | 6.62×10 <sup>7</sup> | 2.65%  |
| IGDDL  | 532.26 | 1.11×10 <sup>8</sup> | 4.42%  |
| MDALTI | 532.30 | 1.47×10 <sup>8</sup> | 5.88%  |
| TLGNE  | 533.25 | 4.98×10 <sup>7</sup> | 1.99%  |
| TGDIE  | 534.24 | 9.58×10 <sup>7</sup> | 3.83%  |
| SADML  | 536.24 | 4.66×10 <sup>7</sup> | 1.86%  |

|         |        |                      |        |
|---------|--------|----------------------|--------|
| FDAGAG  | 537.23 | 2.40×10 <sup>7</sup> | 0.96%  |
| YGGEI   | 538.25 | 1.10×10 <sup>8</sup> | 4.41%  |
| SYVGD   | 540.23 | 4.00×10 <sup>7</sup> | 1.60%  |
| EILAP   | 542.32 | 5.80×10 <sup>7</sup> | 2.32%  |
| DIAPK   | 543.31 | 5.77×10 <sup>7</sup> | 2.31%  |
| VGVVVA  | 543.35 | 4.46×10 <sup>7</sup> | 1.78%  |
| PIISD   | 544.30 | 1.07×10 <sup>8</sup> | 4.28%  |
| VSLPE   | 544.30 | 8.28×10 <sup>7</sup> | 3.31%  |
| IADIL   | 544.33 | 1.61×10 <sup>8</sup> | 6.43%  |
| VDVGGV  | 545.29 | 1.02×10 <sup>8</sup> | 4.06%  |
| GDLKL   | 545.33 | 6.81×10 <sup>7</sup> | 2.72%  |
| ALDDI   | 546.27 | 1.32×10 <sup>8</sup> | 5.26%  |
| GDLGGE  | 547.23 | 7.55×10 <sup>7</sup> | 3.02%  |
| ESAIQ   | 547.27 | 7.33×10 <sup>7</sup> | 2.93%  |
| ELGTE   | 548.25 | 1.05×10 <sup>8</sup> | 4.18%  |
| FDNVG   | 551.24 | 1.23×10 <sup>7</sup> | 0.49%  |
| MEFEE   | 553.21 | 4.25×10 <sup>7</sup> | 1.70%  |
| VGGLPN  | 556.31 | 3.84×10 <sup>7</sup> | 1.54%  |
| IAEPE   | 558.27 | 3.73×10 <sup>7</sup> | 1.49%  |
| VVDLL   | 558.35 | 5.10×10 <sup>7</sup> | 2.04%  |
| QDIIA   | 559.31 | 1.57×10 <sup>8</sup> | 6.28%  |
| IGGSIL  | 559.34 | 6.35×10 <sup>7</sup> | 2.54%  |
| DAVAGK  | 560.30 | 5.10×10 <sup>8</sup> | 20.38% |
| MDSLQV  | 561.29 | 1.21×10 <sup>8</sup> | 4.84%  |
| SVDLGA  | 561.29 | 1.19×10 <sup>8</sup> | 4.77%  |
| LGDEE   | 562.23 | 3.46×10 <sup>7</sup> | 1.38%  |
| DNGSGL  | 562.24 | 4.88×10 <sup>7</sup> | 1.95%  |
| FGQPN   | 562.26 | 4.14×10 <sup>7</sup> | 1.66%  |
| MSGDDGI | 563.23 | 6.07×10 <sup>7</sup> | 2.43%  |
| VGNEF   | 565.26 | 6.68×10 <sup>7</sup> | 2.67%  |
| VSGGVF  | 565.30 | 4.75×10 <sup>7</sup> | 1.90%  |
| SVGGVF  | 565.30 | 4.76×10 <sup>7</sup> | 1.90%  |
| DLDFG   | 566.24 | 6.63×10 <sup>7</sup> | 2.65%  |
| LLPVGA  | 569.36 | 4.30×10 <sup>7</sup> | 1.72%  |
| VNLPGA  | 570.32 | 3.20×10 <sup>7</sup> | 1.28%  |
| VILPE   | 570.35 | 6.53×10 <sup>7</sup> | 2.61%  |
| VGGEPL  | 571.31 | 8.28×10 <sup>7</sup> | 3.31%  |
| DDPLL   | 572.29 | 9.58×10 <sup>7</sup> | 3.83%  |

|         |        |                      |       |
|---------|--------|----------------------|-------|
| DLVGGL  | 573.32 | 1.28×10 <sup>8</sup> | 5.11% |
| DITGGI  | 575.30 | 9.89×10 <sup>7</sup> | 3.95% |
| EELGE   | 576.25 | 7.67×10 <sup>7</sup> | 3.06% |
| TLDDL   | 576.29 | 8.51×10 <sup>7</sup> | 3.40% |
| VLDTM   | 578.28 | 1.65×10 <sup>8</sup> | 6.58% |
| EGPMF   | 580.24 | 1.60×10 <sup>7</sup> | 0.64% |
| VGGGEY  | 581.25 | 4.33×10 <sup>7</sup> | 1.73% |
| YVGDE   | 582.24 | 3.72×10 <sup>7</sup> | 1.49% |
| PGSPK   | 582.32 | 3.65×10 <sup>7</sup> | 1.46% |
| EAPGPI  | 583.31 | 1.51×10 <sup>8</sup> | 6.04% |
| NIPLE   | 585.32 | 2.11×10 <sup>8</sup> | 8.41% |
| IVEPE   | 586.31 | 1.43×10 <sup>8</sup> | 5.72% |
| INPDE   | 587.27 | 6.63×10 <sup>7</sup> | 2.65% |
| EVDDL   | 590.26 | 2.35×10 <sup>8</sup> | 9.39% |
| EDQSI   | 591.26 | 6.85×10 <sup>7</sup> | 2.74% |
| LFGAPS  | 591.31 | 3.59×10 <sup>7</sup> | 1.44% |
| TDFIP   | 592.30 | 7.17×10 <sup>7</sup> | 2.86% |
| EHPVL   | 594.32 | 2.53×10 <sup>7</sup> | 1.01% |
| PSTSGF  | 595.27 | 4.86×10 <sup>7</sup> | 1.94% |
| EHPTL   | 596.30 | 2.10×10 <sup>7</sup> | 0.84% |
| PVGVGPA | 596.34 | 1.35×10 <sup>7</sup> | 0.54% |
| FDGGSD  | 597.21 | 5.68×10 <sup>7</sup> | 2.27% |
| DFDSD   | 598.20 | 9.51×10 <sup>6</sup> | 0.38% |
| DFETS   | 598.23 | 1.36×10 <sup>7</sup> | 0.54% |
| VPGVID  | 599.34 | 7.16×10 <sup>7</sup> | 2.86% |
| LEKPLG  | 599.37 | 3.18×10 <sup>7</sup> | 1.27% |
| SPADVL  | 601.32 | 6.94×10 <sup>7</sup> | 2.77% |
| DGVVLV  | 601.35 | 3.69×10 <sup>7</sup> | 1.47% |
| RVVDL   | 601.36 | 2.66×10 <sup>7</sup> | 1.06% |
| IIDQGG  | 602.31 | 6.32×10 <sup>7</sup> | 2.53% |
| DDIIQ   | 603.30 | 1.03×10 <sup>8</sup> | 4.12% |
| LDDLE   | 604.28 | 4.52×10 <sup>7</sup> | 1.81% |
| ESGLAGA | 604.29 | 2.32×10 <sup>7</sup> | 0.93% |
| SGLDVD  | 605.28 | 5.53×10 <sup>7</sup> | 2.21% |
| VNPLY   | 605.33 | 1.39×10 <sup>8</sup> | 5.57% |
| EFGASP  | 607.27 | 3.83×10 <sup>7</sup> | 1.53% |
| DFNSM   | 613.23 | 1.03×10 <sup>7</sup> | 0.41% |
| GNPTVE  | 616.29 | 2.24×10 <sup>7</sup> | 0.90% |

|         |        |                      |       |
|---------|--------|----------------------|-------|
| GVAPVSS | 616.33 | 4.09×10 <sup>7</sup> | 1.63% |
| LEIEL   | 616.35 | 2.82×10 <sup>7</sup> | 1.13% |
| VVGDDL  | 617.31 | 1.28×10 <sup>8</sup> | 5.10% |
| GPYGPQ  | 618.29 | 1.49×10 <sup>7</sup> | 0.60% |
| LVEEE   | 618.30 | 4.24×10 <sup>7</sup> | 1.69% |
| GSVDLQ  | 618.31 | 6.00×10 <sup>7</sup> | 2.40% |
| MDALK   | 619.31 | 8.72×10 <sup>7</sup> | 3.48% |
| VYEPL   | 620.33 | 7.24×10 <sup>7</sup> | 2.89% |
| PFDQD   | 621.25 | 2.89×10 <sup>7</sup> | 1.16% |
| KDFVL   | 621.36 | 4.44×10 <sup>7</sup> | 1.77% |
| DLTDY   | 626.26 | 7.40×10 <sup>7</sup> | 2.96% |
| EAPAAPA | 626.31 | 1.76×10 <sup>8</sup> | 7.04% |
| PAAEAAP | 626.31 | 6.87×10 <sup>7</sup> | 2.75% |
| LQLPR   | 626.40 | 1.21×10 <sup>7</sup> | 0.48% |
| GAPGTPQ | 627.31 | 4.41×10 <sup>7</sup> | 1.76% |
| QGLSPQ  | 629.32 | 2.17×10 <sup>7</sup> | 0.87% |
| TEPVIA  | 629.35 | 2.35×10 <sup>7</sup> | 0.94% |
| ISPSVE  | 631.33 | 4.43×10 <sup>7</sup> | 1.77% |
| WDVTD   | 635.26 | 2.54×10 <sup>7</sup> | 1.01% |
| KIEDM   | 635.30 | 5.96×10 <sup>7</sup> | 2.38% |
| GLDGLY  | 637.32 | 4.80×10 <sup>7</sup> | 1.92% |
| FGTGEE  | 639.26 | 1.68×10 <sup>7</sup> | 0.67% |
| ILAPEP  | 639.37 | 1.54×10 <sup>8</sup> | 6.15% |
| IAPPE   | 639.37 | 1.48×10 <sup>8</sup> | 5.91% |
| VNLPGAA | 641.36 | 2.32×10 <sup>7</sup> | 0.93% |
| ALPVIE  | 641.38 | 4.62×10 <sup>7</sup> | 1.85% |
| IVAPGKG | 641.40 | 4.54×10 <sup>7</sup> | 1.81% |
| EPDVLA  | 643.33 | 4.92×10 <sup>7</sup> | 1.96% |
| GLLNVE  | 644.36 | 3.52×10 <sup>7</sup> | 1.41% |
| EGLTVK  | 646.37 | 1.92×10 <sup>7</sup> | 0.77% |
| MEELEE  | 648.27 | 1.13×10 <sup>8</sup> | 4.52% |
| EANFPA  | 648.29 | 4.70×10 <sup>7</sup> | 1.88% |
| KYPLE   | 649.35 | 1.07×10 <sup>8</sup> | 4.27% |
| QEPMF   | 651.28 | 2.75×10 <sup>7</sup> | 1.10% |
| FDENE   | 653.24 | 3.80×10 <sup>7</sup> | 1.52% |
| LSGLPLG | 656.40 | 2.54×10 <sup>7</sup> | 1.01% |
| SLPQVN  | 657.35 | 2.37×10 <sup>7</sup> | 0.95% |
| LPIDIS  | 657.38 | 6.74×10 <sup>7</sup> | 2.69% |

|            |        |                    |       |
|------------|--------|--------------------|-------|
| PIDILS     | 657.38 | $6.80 \times 10^7$ | 2.72% |
| ELPDGQ     | 658.30 | $1.55 \times 10^8$ | 6.20% |
| LDSVAGV    | 660.35 | $2.78 \times 10^7$ | 1.11% |
| ADVEDL     | 661.30 | $5.18 \times 10^7$ | 2.07% |
| LEAPPH     | 663.34 | $4.94 \times 10^7$ | 1.97% |
| TNGDEE     | 664.24 | $1.37 \times 10^7$ | 0.55% |
| SEGETF     | 669.27 | $3.29 \times 10^7$ | 1.32% |
| LQGEVE     | 674.33 | $2.60 \times 10^7$ | 1.04% |
| LEGDLK     | 674.37 | $4.88 \times 10^7$ | 1.95% |
| WDNDM      | 680.23 | $2.07 \times 10^7$ | 0.83% |
| HESPVL     | 681.35 | $3.56 \times 10^7$ | 1.42% |
| RVPTNP     | 683.38 | $4.02 \times 10^7$ | 1.60% |
| DVEVVQ     | 688.35 | $9.14 \times 10^7$ | 3.65% |
| GGGSGGGAGG | 690.28 | $1.77 \times 10^7$ | 0.71% |
| ELDGGAE    | 690.29 | $2.19 \times 10^7$ | 0.87% |
| LDADGAE    | 690.29 | $2.18 \times 10^7$ | 0.87% |
| WDDME      | 695.23 | $1.36 \times 10^7$ | 0.54% |
| IDFGMD     | 697.28 | $9.91 \times 10^6$ | 0.40% |
| PGLPEAN    | 697.35 | $3.27 \times 10^7$ | 1.31% |
| LILLLL     | 697.52 | $1.30 \times 10^7$ | 0.52% |
| PAEEVR     | 700.36 | $1.22 \times 10^7$ | 0.49% |
| VDLPGLS    | 700.38 | $4.45 \times 10^7$ | 1.78% |
| VSGAELE    | 704.34 | $4.44 \times 10^7$ | 1.77% |
| SKQDVE     | 705.34 | $2.46 \times 10^7$ | 0.98% |
| LVLVPAP    | 708.46 | $1.91 \times 10^7$ | 0.76% |
| LGELTSP    | 716.38 | $3.72 \times 10^7$ | 1.49% |
| LGETLPS    | 716.38 | $3.64 \times 10^7$ | 1.45% |
| DLKDDI     | 718.36 | $6.13 \times 10^7$ | 2.45% |
| KDIDDL     | 718.36 | $3.92 \times 10^7$ | 1.57% |
| DIDDLE     | 719.31 | $2.63 \times 10^7$ | 1.05% |
| SAGDGSIL   | 719.35 | $1.80 \times 10^7$ | 0.72% |
| VNPVYE     | 720.35 | $2.97 \times 10^7$ | 1.19% |
| VGGVPYE    | 720.35 | $3.00 \times 10^7$ | 1.20% |
| EYPDLS     | 723.32 | $1.05 \times 10^7$ | 0.42% |
| NVPLYE     | 734.37 | $1.50 \times 10^8$ | 5.99% |
| QESPMF     | 738.31 | $8.78 \times 10^6$ | 0.35% |
| DLTDYL     | 739.35 | $1.08 \times 10^7$ | 0.43% |
| PEDVLGL    | 742.39 | $2.01 \times 10^7$ | 0.80% |

|              |         |                      |       |
|--------------|---------|----------------------|-------|
| EPAVDLT      | 744.37  | 2.99×10 <sup>7</sup> | 1.19% |
| PTPPNKP      | 750.41  | 1.01×10 <sup>7</sup> | 0.40% |
| DKPVSIP      | 755.43  | 1.88×10 <sup>7</sup> | 0.75% |
| SEALDLL      | 760.41  | 1.93×10 <sup>7</sup> | 0.77% |
| IDVDVSN      | 761.36  | 1.07×10 <sup>7</sup> | 0.43% |
| DESLGK       | 761.40  | 1.18×10 <sup>7</sup> | 0.47% |
| LKYPIE       | 762.44  | 1.04×10 <sup>7</sup> | 0.42% |
| EAPLNPK      | 768.42  | 2.47×10 <sup>7</sup> | 0.99% |
| LPDLISD      | 772.41  | 1.77×10 <sup>7</sup> | 0.71% |
| TEDQVVS      | 777.36  | 4.41×10 <sup>7</sup> | 1.76% |
| DWTLNM       | 779.34  | 1.03×10 <sup>7</sup> | 0.41% |
| GEQIDNL      | 788.38  | 4.00×10 <sup>7</sup> | 1.60% |
| TVDDVIQ      | 789.40  | 1.51×10 <sup>7</sup> | 0.60% |
| NWDDME       | 809.27  | 1.82×10 <sup>7</sup> | 0.73% |
| PGDIVIID     | 841.46  | 1.50×10 <sup>7</sup> | 0.60% |
| EAPGPINF     | 844.42  | 3.34×10 <sup>7</sup> | 1.34% |
| SVIMGMSH     | 861.40  | 1.30×10 <sup>7</sup> | 0.52% |
| TEAPLNPK     | 869.47  | 2.86×10 <sup>7</sup> | 1.14% |
| PDGQEVLL     | 870.45  | 5.53×10 <sup>7</sup> | 2.21% |
| IDGDEVLN     | 874.41  | 2.68×10 <sup>7</sup> | 1.07% |
| IANDMLVD     | 890.42  | 1.64×10 <sup>7</sup> | 0.66% |
| LVPIVEPE     | 895.51  | 5.40×10 <sup>7</sup> | 2.16% |
| IVPIVEPE     | 895.51  | 5.40×10 <sup>7</sup> | 2.16% |
| LGEQIDNL     | 901.46  | 8.89×10 <sup>6</sup> | 0.36% |
| PASLPDCF     | 906.40  | 2.42×10 <sup>7</sup> | 0.97% |
| ENAPSFLE     | 906.42  | 9.61×10 <sup>6</sup> | 0.38% |
| GVDNPGHPF    | 939.43  | 1.05×10 <sup>7</sup> | 0.42% |
| ELPDGQVIT    | 971.50  | 2.03×10 <sup>7</sup> | 0.81% |
| DLPDLQDVA    | 985.48  | 1.02×10 <sup>7</sup> | 0.41% |
| EEDHLRVI     | 1010.52 | 9.96×10 <sup>6</sup> | 0.40% |
| TGVDNPGHPF   | 1040.47 | 1.11×10 <sup>7</sup> | 0.44% |
| SLSGLEGGESI  | 1048.51 | 1.54×10 <sup>7</sup> | 0.61% |
| SIEDPFDQD    | 1065.43 | 2.85×10 <sup>7</sup> | 1.14% |
| ELPDGQVITI   | 1084.59 | 3.46×10 <sup>7</sup> | 1.38% |
| GSDGDGKIGVD  | 1134.49 | 6.32×10 <sup>7</sup> | 2.53% |
| AGDDAPRAVFPS | 1202.57 | 1.15×10 <sup>7</sup> | 0.46% |
| VSVGDKVPADIR | 1255.70 | 1.78×10 <sup>7</sup> | 0.71% |
| KPGMPNVSNDLS | 1258.62 | 8.93×10 <sup>7</sup> | 3.57% |



|               |         |                    |       |
|---------------|---------|--------------------|-------|
| IIDQDKSGFIE   | 1264.64 | $4.35 \times 10^5$ | 0.02% |
| VVGDDLTVTNPKR | 1413.77 | $2.62 \times 10^7$ | 1.05% |

---

Supplementary Table 2 Sequence and mass spectrum analysis results of peptides from *Glycine**max*

| peptide composition | Molecular weight | Ionic strength | Percent content (%) |
|---------------------|------------------|----------------|---------------------|
| SRLRKDPGP           | 1024.58          | 15.4           | 0.17%               |
| DETFMMGVI           | 1098.51          | 28.6           | 0.32%               |
| LIWAKNGH            | 1050.51          | 36.6           | 0.41%               |
| TDVPAE              | 630.36           | 54.8           | 0.61%               |
| SRTVVQ              | 688.26           | 58.3           | 0.65%               |
| MGVIR               | 574.31           | 61             | 0.68%               |
| EGKDWEDQLGADIK      | 1584.73          | 64.4           | 0.72%               |
| QPQEQN              | 742.32           | 64.4           | 0.72%               |
| FLMEME              | 814.45           | 70             | 0.78%               |
| FIFMLT              | 814.41           | 73.7           | 0.82%               |
| VVEDLSINIYS         | 1251.75          | 76.1           | 0.85%               |
| VQMVLQ              | 716.45           | 77.5           | 0.86%               |
| ERLSHR              | 796.45           | 78.6           | 0.87%               |
| SIPRSPL             | 855.49           | 84.5           | 0.94%               |
| TASPVLPAR           | 910.48           | 100            | 1.11%               |
| GADVRYTF            | 1026.50          | 108            | 1.21%               |
| SQRPQ               | 614.32           | 110            | 1.22%               |
| VHSM                | 472.25           | 111            | 1.24%               |
| GFGGMPLNLLGLGAGTV   | 1572.82          | 157            | 1.75%               |
| EEKLEQ              | 774.44           | 199            | 2.22%               |
| ILIIILLIGG          | 1375.03          | 231            | 2.57%               |
| SVPFSPNNPT          | 1058.61          | 238            | 2.64%               |
| GANTSNSAGRLAIN      | 1344.73          | 243            | 2.70%               |
| LHKTMQ              | 756.35           | 286            | 3.19%               |
| GEGVEDLQP           | 942.55           | 291            | 3.24%               |
| QPMLPK              | 712.40           | 297            | 3.31%               |
| MLRDPFE             | 906.38           | 306            | 3.40%               |
| RDRSPAGP            | 854.37           | 344            | 3.83%               |
| ESVALLVVRPSS        | 1255.66          | 346            | 3.85%               |
| FTVAVGEIQAD         | 1148.57          | 348            | 3.87%               |
| KFSGL               | 550.35           | 359            | 3.99%               |
| LLPIFILGVF          | 1243.93          | 368            | 4.09%               |
| AGDDAPRAVFPS        | 1201.58          | 369            | 4.10%               |
| INRGVPT             | 756.40           | 392            | 4.34%               |
| ELPDFRD             | 872.47           | 392            | 4.37%               |
| AGNRGSVSEDGDA       | 1234.58          | 392            | 4.37%               |
| RQQGAP              | 656.33           | 397            | 4.42%               |
| TDRLLAG             | 744.42           | 413            | 4.59%               |

|              |         |                      |        |
|--------------|---------|----------------------|--------|
| PFGLNGIQKV   | 1170.62 | 414                  | 4.61%  |
| APSVNIV      | 698.32  | 429                  | 4.77%  |
| RGEAYTM      | 826.49  | 431                  | 4.80%  |
| IGKFFE       | 739.39  | 438                  | 4.87%  |
| DQLDDGGKV    | 945.47  | 454                  | 5.05%  |
| IMIILLRFL    | 1130.84 | 461                  | 5.13%  |
| QMGA AIGK    | 774.39  | 482                  | 5.36%  |
| HEFGLQP      | 826.36  | 492                  | 5.47%  |
| SVQDFPQG     | 876.35  | 537                  | 5.98%  |
| TLGMIAGT     | 762.40  | 538                  | 5.98%  |
| QVFNP        | 732.34  | 552                  | 6.15%  |
| QWINPPSEL    | 1082.56 | 567                  | 6.32%  |
| LYSAR        | 608.34  | 584                  | 6.50%  |
| ATKNPA       | 600.29  | 600                  | 6.67%  |
| AEVLS        | 742.46  | 615                  | 6.85%  |
| PACIPDPN     | 883.33  | 632                  | 7.03%  |
| DFERES       | 782.36  | 637                  | 7.09%  |
| TFSDKQVVH    | 1059.53 | 648                  | 7.21%  |
| GSLNGSPNL    | 858.40  | 649                  | 7.22%  |
| RQPQ         | 913.46  | 685                  | 7.63%  |
| VTSMIADT     | 836.47  | 697                  | 7.76%  |
| TMVPH        | 599.31  | 773                  | 8.61%  |
| IQTAAVPGA    | 826.52  | 792                  | 8.81%  |
| VRTEWAPL     | 970.50  | 807                  | 8.98%  |
| ERAVP        | 570.35  | 869                  | 9.67%  |
| RRFVDVQ      | 918.46  | 880                  | 9.80%  |
| QVSFAMPK     | 922.42  | 908                  | 10.10% |
| GEGNEDILIV   | 1057.48 | 939                  | 10.45% |
| TIQNVVIQ     | 914.49  | 941                  | 10.47% |
| RLTDAAHST    | 970.46  | 965                  | 10.74% |
| ILLLILILITGM | 1583.17 | 992                  | 11.04% |
| AEFESI       | 694.39  | 992                  | 11.04% |
| VSGIAGPL     | 712.42  | 1.01×10 <sup>3</sup> | 11.22% |
| GESLVGLV     | 772.43  | 1.01×10 <sup>3</sup> | 11.23% |
| DWRVF        | 721.34  | 1.01×10 <sup>3</sup> | 11.26% |
| GAKGSMAGL    | 790.49  | 1.01×10 <sup>3</sup> | 11.26% |
| EQPQQ        | 756.38  | 1.04×10 <sup>3</sup> | 11.53% |
| ILILILILI    | 1261.93 | 1.06×10 <sup>3</sup> | 11.83% |
| ILLLILILI    | 1261.93 | 1.06×10 <sup>3</sup> | 11.83% |
| KLIK         | 500.37  | 1.09×10 <sup>3</sup> | 12.18% |
| KRISPQ       | 727.40  | 1.10×10 <sup>3</sup> | 12.19% |
| GTRTLGAR     | 830.43  | 1.13×10 <sup>3</sup> | 12.56% |
| LIIPH        | 591.38  | 1.14×10 <sup>3</sup> | 12.65% |
| KAQSSY       | 708.34  | 1.15×10 <sup>3</sup> | 12.83% |

|              |         |                      |        |
|--------------|---------|----------------------|--------|
| VVPLMGLG     | 784.46  | 1.23×10 <sup>3</sup> | 13.69% |
| PKGETIAY     | 877.47  | 1.26×10 <sup>3</sup> | 14.05% |
| APAKTPDILSK  | 1240.74 | 1.29×10 <sup>3</sup> | 14.36% |
| YSRAIQ       | 736.36  | 1.30×10 <sup>3</sup> | 14.45% |
| DVVGLGIA     | 742.40  | 1.37×10 <sup>3</sup> | 15.30% |
| GGSGPPPP     | 664.35  | 1.40×10 <sup>3</sup> | 15.57% |
| TPMQLAAAI    | 914.50  | 1.44×10 <sup>3</sup> | 16.01% |
| DASVILK      | 744.40  | 1.45×10 <sup>3</sup> | 16.11% |
| EVNDNPNL     | 914.50  | 1.45×10 <sup>3</sup> | 16.15% |
| RIVPSGT      | 728.42  | 1.54×10 <sup>3</sup> | 17.18% |
| DHRFGAD      | 816.37  | 1.58×10 <sup>3</sup> | 17.57% |
| EDNAGVIVNPK  | 1155.64 | 1.60×10 <sup>3</sup> | 17.84% |
| SEGGLLK      | 702.36  | 1.62×10 <sup>3</sup> | 18.00% |
| ISRNIE       | 730.40  | 1.65×10 <sup>3</sup> | 18.37% |
| LLIPH        | 591.37  | 1.65×10 <sup>3</sup> | 18.39% |
| AEQMLDAAA    | 918.44  | 1.74×10 <sup>3</sup> | 19.39% |
| LTYYIFV      | 754.46  | 1.79×10 <sup>3</sup> | 19.90% |
| IIILLLL      | 922.68  | 1.80×10 <sup>3</sup> | 20.07% |
| IILLLLI      | 922.68  | 1.80×10 <sup>3</sup> | 20.07% |
| ILIIIL       | 922.68  | 1.80×10 <sup>3</sup> | 20.07% |
| LIILILL      | 922.68  | 1.80×10 <sup>3</sup> | 20.07% |
| LLLLLLLI     | 922.68  | 1.80×10 <sup>3</sup> | 20.07% |
| LILIIIL      | 922.68  | 1.80×10 <sup>3</sup> | 20.07% |
| LLLLLIL      | 922.68  | 1.80×10 <sup>3</sup> | 20.07% |
| LIILLLL      | 922.68  | 1.80×10 <sup>3</sup> | 20.07% |
| LLLLLLLL     | 922.68  | 1.80×10 <sup>3</sup> | 20.07% |
| LLILIIIL     | 922.68  | 1.80×10 <sup>3</sup> | 20.07% |
| ILLLILII     | 922.68  | 1.80×10 <sup>3</sup> | 20.07% |
| LLLILIII     | 922.68  | 1.80×10 <sup>3</sup> | 20.07% |
| ILLLLLLL     | 922.68  | 1.80×10 <sup>3</sup> | 20.07% |
| PFPLQPT      | 895.56  | 1.82×10 <sup>3</sup> | 20.23% |
| FPPLQPTP     | 895.56  | 1.82×10 <sup>3</sup> | 20.23% |
| VGFGDL       | 606.32  | 1.82×10 <sup>3</sup> | 20.27% |
| GAVVTSPPK    | 854.40  | 1.85×10 <sup>3</sup> | 20.54% |
| GENALMLAVWGS | 1262.64 | 1.85×10 <sup>3</sup> | 20.58% |
| ADGGKQNAEHS  | 1112.57 | 1.86×10 <sup>3</sup> | 20.67% |
| IIIIILLLL    | 1148.85 | 1.97×10 <sup>3</sup> | 21.93% |
| LIILLLLLI    | 1148.85 | 1.97×10 <sup>3</sup> | 21.93% |
| ILLLIIIL     | 1148.85 | 1.98×10 <sup>3</sup> | 22.04% |
| LLLLIIILI    | 1148.85 | 1.98×10 <sup>3</sup> | 22.04% |
| THGY         | 476.19  | 2.01×10 <sup>3</sup> | 22.37% |
| ANNDNRSR     | 1003.46 | 2.07×10 <sup>3</sup> | 23.06% |
| TDRALELA     | 887.50  | 2.09×10 <sup>3</sup> | 23.29% |
| LEEGVTLF     | 856.51  | 2.12×10 <sup>3</sup> | 23.60% |

|              |         |                      |        |
|--------------|---------|----------------------|--------|
| KREPKLE      | 898.42  | 2.20×10 <sup>3</sup> | 24.45% |
| ENQPGIEI     | 898.42  | 2.20×10 <sup>3</sup> | 24.45% |
| AMGAELTRIIA  | 1144.66 | 2.35×10 <sup>3</sup> | 26.19% |
| LNKAPSPQ     | 854.38  | 2.36×10 <sup>3</sup> | 26.23% |
| IIILILLI     | 1035.77 | 2.38×10 <sup>3</sup> | 26.51% |
| ILIIILLL     | 1035.77 | 2.38×10 <sup>3</sup> | 26.51% |
| LIIILLLL     | 1035.77 | 2.38×10 <sup>3</sup> | 26.51% |
| ILLLILII     | 1035.77 | 2.38×10 <sup>3</sup> | 26.51% |
| LLILIIII     | 1035.77 | 2.38×10 <sup>3</sup> | 26.51% |
| LLLILIII     | 1035.77 | 2.38×10 <sup>3</sup> | 26.51% |
| LLLLLLLLI    | 1035.77 | 2.38×10 <sup>3</sup> | 26.51% |
| IIIIIIII     | 1035.77 | 2.38×10 <sup>3</sup> | 26.51% |
| RSAGAAN      | 645.29  | 2.42×10 <sup>3</sup> | 26.94% |
| AGREA        | 502.29  | 2.70×10 <sup>3</sup> | 30.02% |
| GTGTIAGRPAKS | 1114.50 | 2.72×10 <sup>3</sup> | 30.30% |
| LVPQES       | 768.40  | 2.77×10 <sup>3</sup> | 30.87% |
| HIRLAQ       | 736.35  | 2.82×10 <sup>3</sup> | 31.35% |
| AGGGAPGF     | 648.36  | 2.87×10 <sup>3</sup> | 31.94% |
| LKASSAT      | 676.35  | 2.88×10 <sup>3</sup> | 32.09% |
| NRIE         | 530.28  | 2.89×10 <sup>3</sup> | 32.22% |
| NRLE         | 530.28  | 2.89×10 <sup>3</sup> | 32.22% |
| VHDLK        | 610.34  | 3.00×10 <sup>3</sup> | 33.38% |
| LAHFR        | 642.36  | 3.00×10 <sup>3</sup> | 33.43% |
| TEKVLK       | 716.37  | 3.07×10 <sup>3</sup> | 34.12% |
| PLCDDIMFI    | 1123.47 | 3.38×10 <sup>3</sup> | 37.57% |
| GAIFLTR      | 776.45  | 3.49×10 <sup>3</sup> | 38.79% |
| SVKAKP       | 628.40  | 3.61×10 <sup>3</sup> | 40.16% |
| SILD TN      | 661.33  | 3.62×10 <sup>3</sup> | 40.28% |
| VMRDSY       | 769.29  | 3.75×10 <sup>3</sup> | 41.72% |
| RRFENGE      | 907.40  | 3.80×10 <sup>3</sup> | 42.33% |
| DLFLDE       | 750.37  | 3.99×10 <sup>3</sup> | 44.37% |
| ELGAIP       | 598.38  | 4.07×10 <sup>3</sup> | 45.26% |
| ARAAAIA      | 642.37  | 4.22×10 <sup>3</sup> | 46.92% |
| LAGNKRETI    | 1000.48 | 4.34×10 <sup>3</sup> | 48.29% |
| GAMILGAL     | 744.43  | 4.46×10 <sup>3</sup> | 49.63% |
| AISRP        | 542.31  | 4.63×10 <sup>3</sup> | 51.48% |
| ALSPR        | 542.31  | 4.63×10 <sup>3</sup> | 51.48% |
| VNNNPV       | 656.35  | 4.82×10 <sup>3</sup> | 53.68% |
| QEQLR        | 672.39  | 4.99×10 <sup>3</sup> | 55.55% |
| VIHPN        | 578.32  | 5.01×10 <sup>3</sup> | 55.76% |
| VLKVPLT      | 768.44  | 5.12×10 <sup>3</sup> | 57.02% |
| TLYIPR       | 761.41  | 5.13×10 <sup>3</sup> | 57.14% |
| TEDDGVSY     | 884.31  | 5.17×10 <sup>3</sup> | 57.51% |
| VPRSGT       | 615.34  | 5.20×10 <sup>3</sup> | 57.86% |

|           |         |                    |          |
|-----------|---------|--------------------|----------|
| GVDYR     | 608.30  | $5.63 \times 10^3$ | 62.66%   |
| LAGDGPS   | 615.32  | $5.64 \times 10^3$ | 62.82%   |
| RDYR      | 608.30  | $5.89 \times 10^3$ | 65.53%   |
| ARQAAI    | 628.35  | $5.91 \times 10^3$ | 65.83%   |
| KSRAGAH   | 725.36  | $6.13 \times 10^3$ | 68.27%   |
| ATKLPS    | 615.33  | $7.09 \times 10^3$ | 78.96%   |
| GAVMALR   | 716.39  | $7.26 \times 10^3$ | 80.85%   |
| GHVR      | 467.26  | $7.34 \times 10^3$ | 81.67%   |
| KWSRVQ    | 802.43  | $7.75 \times 10^3$ | 86.22%   |
| NEGGPSLPN | 883.33  | $7.79 \times 10^3$ | 86.67%   |
| LEGFGRSK  | 892.45  | $7.84 \times 10^3$ | 87.30%   |
| WIENVVNGL | 1043.53 | $9.00 \times 10^3$ | 100.22%  |
| VLDGR     | 558.31  | $9.88 \times 10^3$ | 109.92%  |
| VNLIPH    | 692.42  | $1.08 \times 10^4$ | 119.90%  |
| ASPRAP    | 597.33  | $1.15 \times 10^4$ | 128.10%  |
| LVPPQE    | 681.37  | $1.18 \times 10^4$ | 131.28%  |
| NVNYKEY   | 929.51  | $1.27 \times 10^4$ | 141.10%  |
| NIARLA    | 656.36  | $1.33 \times 10^4$ | 148.58%  |
| DFEFLI    | 782.36  | $1.71 \times 10^4$ | 190.55%  |
| PAAGAGHQ  | 707.37  | $1.72 \times 10^4$ | 191.81%  |
| SRTQKEGG  | 861.43  | $1.80 \times 10^4$ | 200.54%  |
| KMRKLGV   | 830.45  | $1.85 \times 10^4$ | 206.25%  |
| ASEPST    | 677.36  | $1.95 \times 10^4$ | 217.52%  |
| LSRMPR    | 758.37  | $2.05 \times 10^4$ | 227.88%  |
| GADNPMQ   | 731.41  | $2.10 \times 10^4$ | 233.27%  |
| EGKLVGK   | 729.38  | $2.32 \times 10^4$ | 257.68%  |
| GQKGVLK   | 729.38  | $2.32 \times 10^4$ | 257.68%  |
| ADKRLK    | 729.38  | $2.32 \times 10^4$ | 257.68%  |
| VMRGLD    | 689.36  | $2.38 \times 10^4$ | 265.40%  |
| FVSF      | 498.26  | $2.59 \times 10^4$ | 288.81%  |
| VLSPQ     | 542.34  | $6.40 \times 10^4$ | 712.11%  |
| VISPK     | 542.34  | $6.40 \times 10^4$ | 712.11%  |
| MVFVCV    | 754.44  | $9.86 \times 10^4$ | 1097.91% |

---

**Supplementary Table 3 Analysis of molecular weight of peptides from *Engraulis japonicus* and *Glycine max***

|    | Mw      | Mn      | dispersion coefficient |
|----|---------|---------|------------------------|
| Ti | 264.15  | 75.4717 | 3.5                    |
| Da | 413.124 | 69.0608 | 5.98                   |
