# Supplementary material for: Positive Intervention of Distinct Peptides in Clostridioides difficile Infection in a Mouse Model
Source: PubMed Central journal article supplement — Commun Biol. 2024 Sep 18;7:1172. doi: 10.1038/s42003-024-06850-x (PMC11410834; doi:10.1038/s42003-024-06850-x), 2024-09-18
Supplement: 42003_2024_6850_MOESM3_ESM.pdf [file 42003_2024_6850_MOESM3_ESM.pdf]

## Description of Additional Supplementary Files

**File name:** Supplementary Data 1

**Description:** Plot data for figures other than Figure 2C.

**File name:** Supplementary Data 2

**Description:** Molecular weight analysis of *E. japonicus* and *G. max* peptides.
